# Supplementary material for: An Experimental Study of a Zeolite Membrane Reactor for Reverse Water Gas Shift
Source: MDPI journal article supplement (doi:10.3390/membranes12121272), 2022-12-15
Supplement: s1 [file s1]

## Supplementary Materials

**Title:** An experimental study of zeolite membrane reactor for reverse water gas shift

**Authors:** Motomu Sakai<sup>1\*</sup>, Kyoka Tanaka<sup>2</sup> and Masahiko Matsukata<sup>1,2,3</sup>

### Affiliation:

1 Research Organization for Nano & Life Innovation, Waseda University, 513

Wasedatsurumaki-cho, Shinjuku-ku, Tokyo 162-0041, Japan

2 Department of Applied Chemistry, Waseda University, 513 Wasedatsurumaki-cho, Shinjuku-ku, Tokyo 162-0041, Japan

3 Advanced Research Institute for Science and Engineering, Waseda University, 513 Wasedatsurumaki-cho, Shinjuku-ku, Tokyo 162-0041, Japan

### \*Corresponding author:

Phone number: +81-3-5286-3850

e-mail address: saka.moto@aoni.waseda.jp

Postal address: 513 Wasedatsurumaki-cho, Shinjuku-ku, Tokyo 162-0041, Japan

Figure S1 shows the photographs of catalysts.

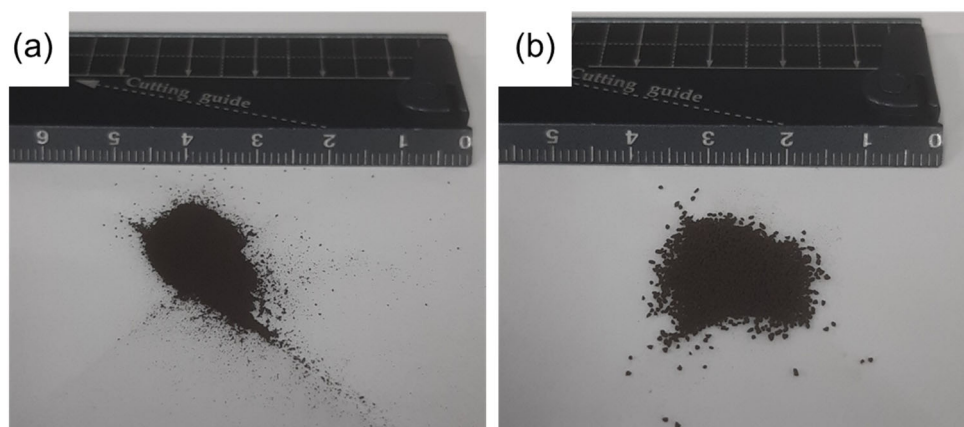

Figure S1 The photographs of catalysts. (a) as-made; (b) after granulation

Figure S2 shows the exit gas compositions of each reactor.

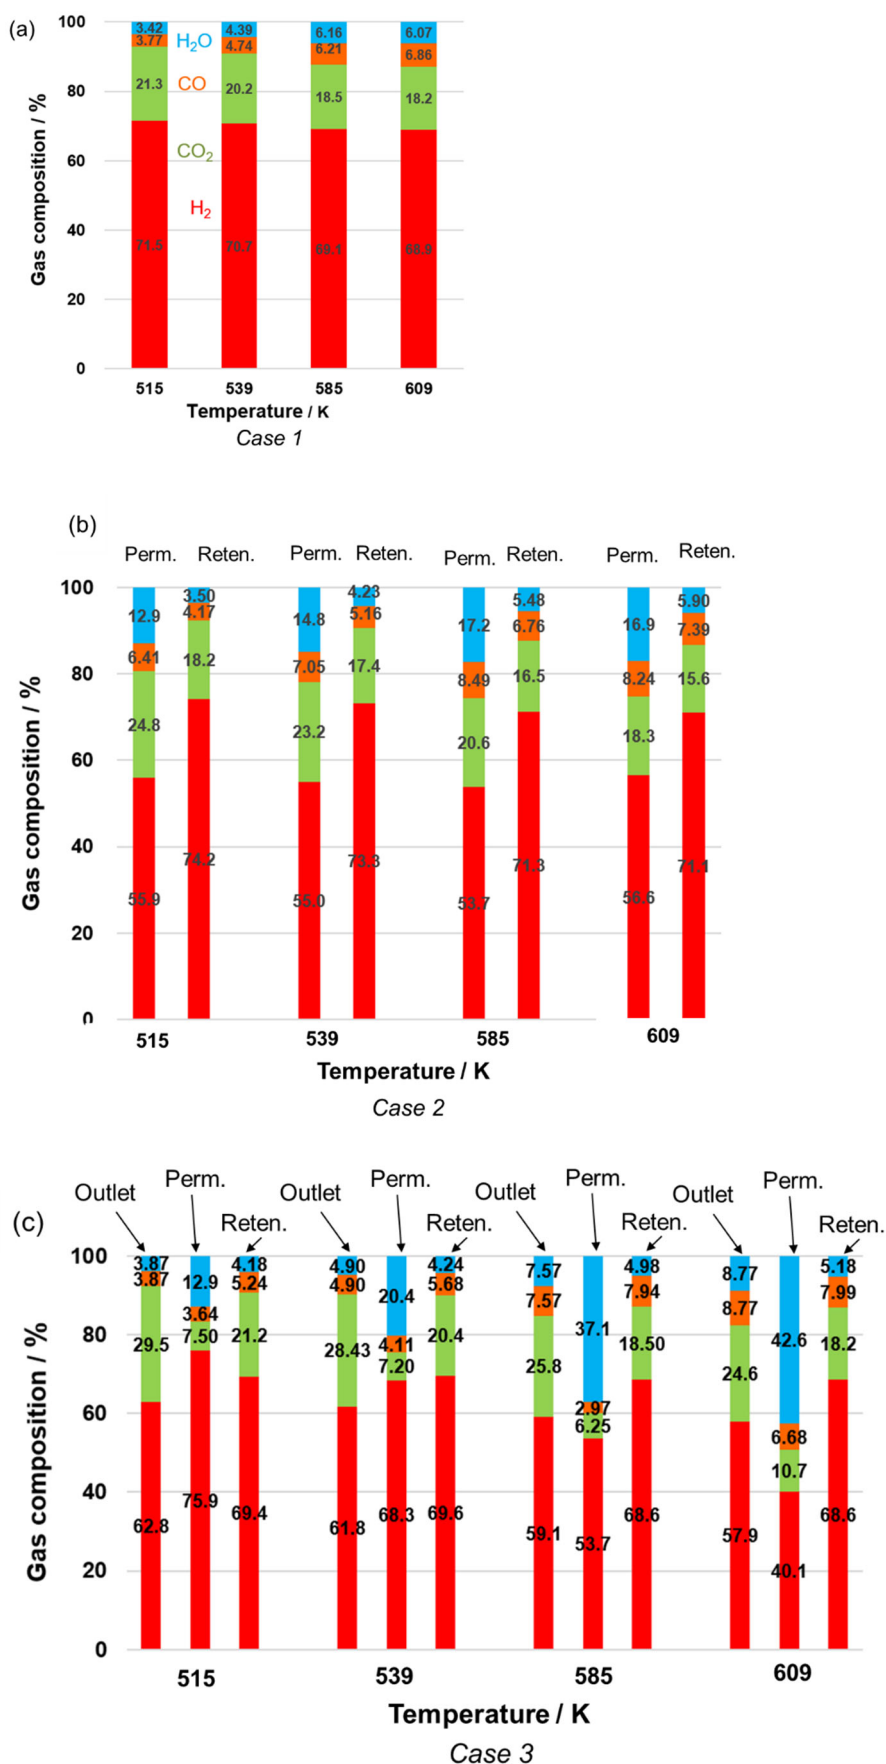

Figure S2 The exit gas compositions of each reactor. (a) Case 1; (b) Case 2; (c) Case 3.

Fig. S3 shows the time course of CO yield in *Case 3*. The CO yield was stable at each temperature at least during the test, 12 h.

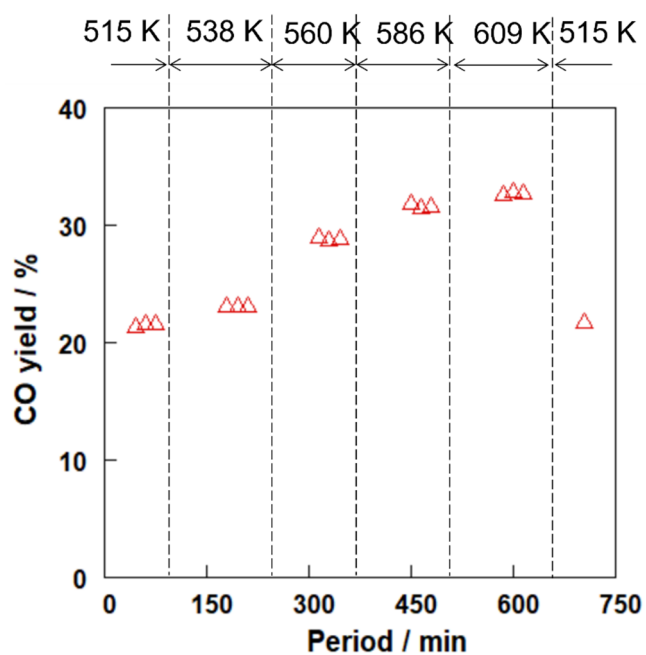

Figure S3 The time course of CO yield in *Case 3*.
